# Supplementary material for: VE-821, an ATR inhibitor, causes radiosensitization in human tumor cells irradiated with high LET radiation
Source: PubMed Central journal article supplement (PMC4554350; doi:10.1186/s13014-015-0464-y), 2015-08-19

# Figure S1

## 1BR- hTERT

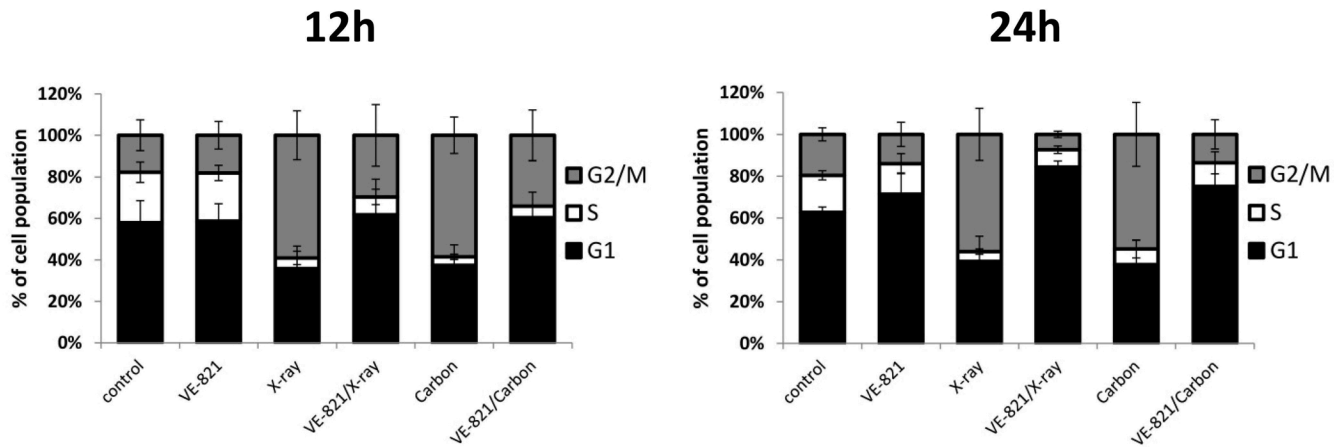

Supplement: 13014_2015_464_MOESM1_ESM.pdf [file 13014_2015_464_MOESM1_ESM.pdf]
